# Supplementary material for: Tolerance mechanism of Trichoderma asperellum to Pb2+: response changes of related active ingredients under Pb2+ stress
Source: Royal Society of Chemistry journal article supplement (doi:10.1039/c9ra10517d), 2020-01-01
Supplement: c9ra10517d1.pdf [file c9ra10517d1.pdf]

**Tolerance mechanism of *Trichoderma asperellum* to Pb<sup>2+</sup>: response changes of  
related active ingredients under Pb<sup>2+</sup> stress**

Huiqing Sun<sup>a,b,c</sup>, Lingran Wu<sup>a,b,c</sup>, Yali Hao<sup>a,b,c</sup>, Chunyu Liu<sup>a,b,c</sup>, Lichao Pan<sup>a,b,c</sup>,  
Zhenyuan Zhu<sup>a,b,c,\*</sup>,

*<sup>a</sup>State Key Laboratory of Food Nutrition and Safety, Tianjin University of Science and  
Technology, Tianjin 300457, PR China*

*<sup>b</sup>Key Laboratory of Food Nutrition and Safety, Ministry of Education, Tianjin  
University of Science and Technology, Tianjin 300457, PR China*

*<sup>c</sup>College of Food Science and Biotechnology, Tianjin University of Science and  
Technology, Tianjin 300457, PR China*

*\*Corresponding author: Tel.: +86 2260912390, Fax: +86 2260912390.*

*E-mail address: [zhyuanzhu@tust.edu.cn](mailto:zhyuanzhu@tust.edu.cn). (Z.Y. Zhu).*

**List of supplementary materials:**

**Table S1** Significance analysis on removal ratio of  $Pb^{2+}$  with fermentation time in different initial concentration of  $Pb^{2+}$

**Table S2** Significance analysis on polysaccharides content in mycelia under  $Pb^{2+}$  stress

**Table S3** Significance analysis on soluble proteins content in mycelia under  $Pb^{2+}$  stress

**Table S4** Significance analysis on thiol compounds in fermentation broth under  $Pb^{2+}$  stress

**Table S5** Significance analysis on thiol compounds in mycelia under  $Pb^{2+}$  stress

**Table S6** Significance analysis on oxalic acid content in fermentation broth under  $Pb^{2+}$  stress

**Table S7** Significance analysis on oxalic acid content in mycelia under  $Pb^{2+}$  stress

**Table S8** Significance analysis on formic acid content in fermentation broth under  $Pb^{2+}$  stress

**Table S9** Significance analysis on formic acid content in mycelia under  $Pb^{2+}$  stress

**Table S10** Significance analysis on malic acid content in fermentation broth under  $Pb^{2+}$  stress

**Table S11** Significance analysis on malic acid content in mycelia under  $Pb^{2+}$  stress

**Table S1** Significance analysis on removal ratio of Pb<sup>2+</sup> with fermentation time in different initial concentration of Pb<sup>2+</sup>

| Initial concentration of Pb <sup>2+</sup> (mg/L) | Fermentation time (h) |    |    |    |    |    |    |    |
|--------------------------------------------------|-----------------------|----|----|----|----|----|----|----|
|                                                  | 24                    | 26 | 28 | 32 | 36 | 48 | 72 | 96 |
| 10                                               | Aa                    | Bb | Cc | Cc | Cc | Cc | Cc | Cc |
| 25                                               | Aa                    | Bb | Cc | Dd | Dd | Dd | Dd | Dd |
| 50                                               | Aa                    | Bb | Cc | Dd | Ee | Ff | Ff | Ff |
| 100                                              | Aa                    | Bb | Cc | Dd | Ee | Ff | Gg | Gg |
| 200                                              | Aa                    | Bb | Cc | Dd | Ee | Ff | Gg | Hh |
| 400                                              | Aa                    | Bb | Cc | Dd | Ee | Ff | Gg | Hh |

Note: The different uppercase letters and lowercase letters in the same line showed that the difference between the groups was extremely significant ( $P < 0.01$ ) and significant ( $P < 0.05$ ), respectively. The same lowercase letters indicated that the difference between the groups was not significant ( $P > 0.05$ ). Same as followed.

**Table S2** Significance analysis on polysaccharides content in mycelia under Pb<sup>2+</sup> stress

| Initial concentration of Pb <sup>2+</sup> (mg/L) | Fermentation time (h) |    |    |    |      |      |      |
|--------------------------------------------------|-----------------------|----|----|----|------|------|------|
|                                                  | 26                    | 28 | 32 | 36 | 48   | 72   | 96   |
| 0                                                | Aa                    | Bb | Cc | Dd | Ee   | Ee   | Ee   |
| 50                                               | Aa                    | Bb | Cc | Dd | Ee   | Ee   | Ee   |
| 100                                              | Aa                    | Bb | Cc | Dd | EFef | Ff   | Ee   |
| 200                                              | Aa                    | Bb | Cc | Dd | Ff   | EFef | Ee   |
| 400                                              | Aa                    | Bb | Cc | Dd | Ff   | Ee   | DEde |

**Table S3** Significance analysis on soluble proteins content in mycelia under Pb<sup>2+</sup> stress

| Initial concentration of Pb <sup>2+</sup> (mg/L) | Fermentation time (h) |    |    |    |    |    |    |
|--------------------------------------------------|-----------------------|----|----|----|----|----|----|
|                                                  | 26                    | 28 | 32 | 36 | 48 | 72 | 96 |
| 0                                                | Dd                    | Cc | Cc | Bb | Aa | Aa | Aa |
| 50                                               | Dd                    | Cc | Cc | Bb | Aa | Aa | Aa |
| 100                                              | Cc                    | Bb | Bb | Aa | Aa | Aa | Aa |
| 200                                              | Cc                    | Bb | Bb | Aa | Aa | Aa | Aa |
| 400                                              | Cc                    | Bb | Bb | Aa | Aa | Aa | Aa |

**Table S4** Significance analysis on thiol compounds in fermentation broth under Pb<sup>2+</sup> stress

| Initial concentration of Pb <sup>2+</sup> (mg/L) | Fermentation time (h) |    |    |    |    |    |    |
|--------------------------------------------------|-----------------------|----|----|----|----|----|----|
|                                                  | 26                    | 28 | 32 | 36 | 48 | 72 | 96 |
| 0                                                | Aa                    | Bb | Ef | De | Dd | Cc | Cc |
| 50                                               | Aa                    | Bb | Dd | Cc | Cc | Bb | Bb |
| 100                                              | Aa                    | Dd | Ff | Ee | Ee | Cc | Bb |
| 200                                              | Aa                    | Cc | Ff | Ee | Dd | Cc | Bb |
| 400                                              | Aa                    | Bb | Ee | Dd | Cc | Bb | Aa |

**Table S5** Significance analysis on thiol compounds in mycelia under Pb<sup>2+</sup> stress

| Initial concentration of Pb <sup>2+</sup> (mg/L) | Fermentation time (h) |    |    |    |    |    |    |
|--------------------------------------------------|-----------------------|----|----|----|----|----|----|
|                                                  | 26                    | 28 | 32 | 36 | 48 | 72 | 96 |
| 0                                                | Aa                    | Bb | Cc | Cc | Dd | Dd | Bb |
| 50                                               | Aa                    | Bb | Cc | Cc | Dd | Ee | Cc |
| 100                                              | Aa                    | Bb | Cc | Dd | Ff | Ff | Ee |
| 200                                              | Aa                    | Bb | Cc | Dd | Ee | Ff | Gg |
| 400                                              | Aa                    | Bb | Cc | Ee | Ff | Ff | Dd |

**Table S6** Significance analysis on oxalic acid content in fermentation broth underPb<sup>2+</sup> stress

| Initial<br>concentration<br>of Pb <sup>2+</sup> (mg/L) | Fermentation time (h) |    |    |    |    |    |    |
|--------------------------------------------------------|-----------------------|----|----|----|----|----|----|
|                                                        | 26                    | 28 | 32 | 36 | 48 | 72 | 96 |
| 0                                                      | Cc                    | Cc | Aa | Aa | Aa | Aa | Aa |
| 50                                                     | Bb                    | Cc | Bb | Aa | Aa | Aa | Aa |
| 100                                                    | Bb                    | Ee | Dd | Cc | Aa | Aa | Aa |
| 200                                                    | Aa                    | Ee | Dd | Cc | Bb | Aa | Aa |
| 400                                                    | Aa                    | Ee | Ee | Dd | Dd | Cc | Bb |



**Table S7** Significance analysis on oxalic acid content in mycelia under Pb<sup>2+</sup> stress

| Initial concentration of Pb <sup>2+</sup> (mg/L) | Fermentation time (h) |    |    |    |    |    |    |
|--------------------------------------------------|-----------------------|----|----|----|----|----|----|
|                                                  | 26                    | 28 | 32 | 36 | 48 | 72 | 96 |
| 0                                                | Bb                    | Dd | Dd | Ee | Dd | Cc | Aa |
| 50                                               | Bb                    | Dd | Ee | Ee | Ee | Cc | Aa |
| 100                                              | Aa                    | Dd | Ee | Dd | Cc | Cc | Bb |
| 200                                              | Aa                    | Bb | Ee | Dd | Cc | Cc | Aa |
| 400                                              | Aa                    | Ee | Ff | Ee | Dd | Cc | Bb |

**Table S8** Significance analysis on formic acid content in fermentation broth underPb<sup>2+</sup> stress

| Initial<br>concentration<br>of Pb <sup>2+</sup> (mg/L) | Fermentation time (h) |    |    |    |    |    |    |
|--------------------------------------------------------|-----------------------|----|----|----|----|----|----|
|                                                        | 26                    | 28 | 32 | 36 | 48 | 72 | 96 |
| 0                                                      | Dd                    | Cc | Bb | Aa | Ee | Dd | Dd |
| 50                                                     | Dd                    | Bb | Bb | Aa | Cc | Dd | Cc |
| 100                                                    | Ee                    | Bb | Aa | Aa | Aa | Dd | Cc |
| 200                                                    | Dd                    | Cc | Aa | Aa | Bb | Cc | Dd |
| 400                                                    | Cc                    | Aa | Aa | Aa | Aa | Bb | Bb |

**Table S9** Significance analysis on formic acid content in mycelia under Pb<sup>2+</sup> stress

| Initial concentration of Pb <sup>2+</sup> (mg/L) | Fermentation time (h) |    |    |    |    |    |    |
|--------------------------------------------------|-----------------------|----|----|----|----|----|----|
|                                                  | 26                    | 28 | 32 | 36 | 48 | 72 | 96 |
| 0                                                | Aa                    | Bb | Cc | Dd | Ee | Dd | Bb |
| 50                                               | Aa                    | Bb | Dd | Ee | Ff | Ee | Cc |
| 100                                              | Aa                    | Bb | Cc | Dd | Ee | Ee | Dd |
| 200                                              | Aa                    | Bb | Bb | Cc | Dd | Ee | Bb |
| 400                                              | Aa                    | Aa | Aa | Bb | Cc | Cc | Aa |

**Table S10** Significance analysis on malic acid content in fermentation broth underPb<sup>2+</sup> stress

| Initial<br>concentration<br>of Pb <sup>2+</sup> (mg/L) | Fermentation time (h) |    |    |      |     |    |    |
|--------------------------------------------------------|-----------------------|----|----|------|-----|----|----|
|                                                        | 26                    | 28 | 32 | 36   | 48  | 72 | 96 |
| 0                                                      | Aa                    | Dd | Ff | Gg   | Ee  | Cc | Bb |
| 50                                                     | Aa                    | Bb | Dd | Ee   | Cc  | Cc | Cc |
| 100                                                    | Bb                    | Aa | Aa | Bb   | Cc  | Dd | Bb |
| 200                                                    | De                    | Cd | Bc | ABbc | Aab | Aa | Aa |
| 400                                                    | Dd                    | Cc | Bb | Aa   | Aa  | Aa | Aa |

**Table S11** Significance analysis on malic acid content in mycelia under Pb<sup>2+</sup> stress

| Initial concentration of Pb <sup>2+</sup> (mg/L) | Fermentation time (h) |    |    |     |      |    |    |
|--------------------------------------------------|-----------------------|----|----|-----|------|----|----|
|                                                  | 26                    | 28 | 32 | 36  | 48   | 72 | 96 |
| 0                                                | Aa                    | Cc | Gg | Fe  | Ee   | Dd | Bb |
| 50                                               | Aa                    | Dd | Fe | Ee  | Cc   | Cc | Bb |
| 100                                              | Aa                    | Bb | Ef | Dde | CDcd | Cc | Cc |
| 200                                              | Aa                    | Cc | Cc | Cc  | Bb   | Bb | Bb |
| 400                                              | Aa                    | Dd | Dd | Cc  | Bb   | Aa | Aa |
